# Supplementary material for: Defining the Immune Checkpoint Landscape in Human Colorectal Cancer Highlights the Relevance of the TIGIT/CD155 Axis for Optimizing Immunotherapy
Source: Cancers (Basel). 2022 Aug 31;14(17):4261. doi: 10.3390/cancers14174261 (PMC9454990; doi:10.3390/cancers14174261)
Supplement: Supplementary file 1 [file cancers-14-04261-s001.zip]

Archive with 7 entries (7 files):
- cancers-1876917-supplementary.pdf
- Figure S1.tif
- Figure S2.tif
- Figure S3.tif
- Figure S4.tif
- Figure S5.tif
- Figure S6.tif
